# Supplementary material
Source: PubMed Central journal article supplement (PMC4619135)
Supplement: NIHMS717446-supplement-Supp_TableS1-S2.pdf [file NIHMS717446-supplement-Supp_TableS1-S2.pdf]

Supplement Table 1. SNPs details

|    | SNP        | Gene   | Chr. | Position<br>GRCh38 | Alleles<br>[1/2] | MAF<br>AA | A1 MAF |       | A1 Excluded |    | HWE<br>P    |
|----|------------|--------|------|--------------------|------------------|-----------|--------|-------|-------------|----|-------------|
|    |            |        |      |                    |                  |           | AA     | EA    | EA          | EA |             |
| 1  | rs4611457  | ADCY7  | 16   | 50262083           | [C/G]            | 0.432     | 2      | 0.466 | 1           |    |             |
| 2  | rs1976115  | ADCY7  | 16   | 50268649           | [T/G]            | 0.058     | 1      | 0.000 | 1           |    | x           |
| 3  | rs3760013  | ADCY7  | 16   | 50285806           | [T/A]            | 0.481     | 1      | 0.291 | 1           |    |             |
| 4  | rs9936021  | ADCY7  | 16   | 50292302           | [A/C]            | 0.237     | 2      | 0.239 | 2           |    |             |
| 5  | rs2302715  | ADCY7  | 16   | 50293683           | [T/C]            | 0.393     | 2      | 0.435 | 1           |    |             |
| 6  | rs1540624  | ADCY7  | 16   | 50294095           | [A/G]            | 0.394     | 1      | 0.438 | 2           |    |             |
| 7  | rs729229   | ADCY7  | 16   | 50299466           | [A/C]            | 0.387     | 1      | 0.231 | 1           |    |             |
| 8  | rs4785210  | ADCY7  | 16   | 50306243           | [A/G]            | 0.290     | 1      | 0.239 | 1           |    |             |
| 9  | rs1064448  | ADCY7  | 16   | 50316972           | [T/G]            | 0.130     | 2      | 0.494 | 1           |    |             |
| 10 | rs10501087 | BDNF   | 11   | 27648561           | [A/G]            | 0.087     | 2      | 0.228 | 2           |    |             |
| 11 | rs1519480  | BDNF   | 11   | 27654165           | [T/C]            | 0.223     | 1      | 0.249 | 2           |    |             |
| 12 | rs7124442  | BDNF   | 11   | 27655494           | [A/G]            | 0.436     | 2      | 0.247 | 2           |    |             |
| 13 | rs6265     | BDNF   | 11   | 27658369           | [A/G]            | 0.051     | 1      | 0.207 | 1           | x  |             |
| 14 | rs7940188  | BDNF   | 11   | 27672192           | [G/C]            | 0.345     | 2      | 0.004 | 2           |    | x           |
| 15 | rs10835210 | BDNF   | 11   | 27674363           | [T/G]            | 0.109     | 1      | 0.487 | 1           |    |             |
| 16 | rs13306221 | BDNF   | 11   | 27701142           | [A/G]            | 0.041     | 1      | 0.047 | 1           | x  | x           |
| 17 | rs7934165  | BDNF   | 11   | 27710436           | [T/C]            | 0.469     | 1      | 0.470 | 2           |    |             |
| 18 | rs962369   | BDNF   | 11   | 27712873           | [A/G]            | 0.152     | 2      | 0.228 | 2           |    |             |
| 19 | rs11030121 | BDNF   | 11   | 27714660           | [A/G]            | 0.440     | 1      | 0.241 | 1           |    |             |
| 20 | rs12273363 | BDNF   | 11   | 27723312           | [T/C]            | 0.092     | 2      | 0.157 | 2           |    |             |
| 21 | rs908867   | BDNF   | 11   | 27724217           | [A/G]            | 0.085     | 1      | 0.069 | 1           |    |             |
| 22 | rs1491850  | BDNF   | 11   | 27728178           | [A/G]            | 0.266     | 2      | 0.412 | 2           |    |             |
| 23 | rs4523973  | CDK5R1 | 17   | 32482437           | [A/G]            | 0.256     | 2      | 0.373 | 2           |    |             |
| 24 | rs756785   | CDK5R1 | 17   | 32485827           | [A/G]            | 0.304     | 1      | 0.373 | 1           |    |             |
| 25 | rs2709376  | CREB1  | 2    | 207525664          | [A/G]            | 0.336     | 1      | 0.047 | 1           |    |             |
| 26 | rs2551640  | CREB1  | 2    | 207543169          | [T/C]            | 0.374     | 1      | 0.330 | 2           |    |             |
| 27 | rs2709359  | CREB1  | 2    | 207550413          | [T/C]            | 0.384     | 1      | 0.026 | 1           |    | x           |
| 28 | rs12694087 | CREB1  | 2    | 207559823          | [T/C]            | 0.085     | 1      | 0.000 | 1           |    | x           |
| 29 | rs10932201 | CREB1  | 2    | 207561533          | [A/G]            | 0.184     | 1      | 0.444 | 1           |    |             |
| 30 | rs16839883 | CREB1  | 2    | 207564618          | [A/G]            | 0.118     | 2      | 0.015 | 2           |    | x           |
| 31 | rs2551919  | CREB1  | 2    | 207565659          | [T/C]            | 0.116     | 1      | 0.220 | 1           |    |             |
| 32 | rs13397461 | CREB1  | 2    | 207593113          | [T/C]            | 0.053     | 2      | 0.000 | 2           |    | x           |
| 33 | rs4745     | EFNA1  | 1    | 155133751          | [T/A]            | 0.162     | 1      | 0.459 | 2           |    |             |
| 34 | rs9297     | EFNA1  | 1    | 155134074          | [A/G]            | 0.271     | 2      | 0.386 | 2           |    |             |
| 35 | rs12904    | EFNA1  | 1    | 155134221          | [A/G]            | 0.287     | 1      | 0.386 | 1           |    |             |
| 36 | rs3770208  | EPHA4  | 2    | 221419926          | [A/G]            | 0.341     | 2      | 0.427 | 1           |    |             |
| 37 | rs2288629  | EPHA4  | 2    | 221442590          | [A/C]            | 0.220     | 2      | 0.236 | 2           |    |             |
| 38 | rs6790692  | EPHA6  | 3    | 97494371           | [T/A]            | 0.167     | 1      | 0.190 | 2           |    |             |
| 39 | rs3732568  | EPHB1  | 3    | 134796494          | [A/C]            | 0.314     | 2      | 0.112 | 1           |    |             |
| 40 | rs1515366  | EPHB1  | 3    | 134873468          | [T/A]            | 0.389     | 1      | 0.334 | 1           |    | 0.0009 (AA) |
| 41 | rs7644369  | EPHB1  | 3    | 134951682          | [A/G]            | 0.401     | 2      | 0.476 | 1           |    |             |
| 42 | rs36110    | EPHB1  | 3    | 134981345          | [A/G]            | 0.164     | 2      | 0.416 | 2           |    |             |
| 43 | rs2030737  | EPHB1  | 3    | 135090535          | [A/G]            | 0.304     | 1      | 0.468 | 2           |    |             |
| 44 | rs359964   | FEV    | 2    | 218977481          | [A/G]            | 0.290     | 1      | 0.019 | 1           |    | x           |
| 45 | rs2301296  | FEV    | 2    | 218981606          | [A/C]            | 0.263     | 1      | 0.019 | 1           |    | x           |
| 46 | rs452985   | FEV    | 2    | 218982293          | [C/G]            | 0.104     | 1      | 0.017 | 1           |    | x           |

|    |            |        |    |           |       |       |   |       |   |  |             |
|----|------------|--------|----|-----------|-------|-------|---|-------|---|--|-------------|
| 47 | rs4645856  | FOS    | 14 | 75280555  | [T/C] | 0.164 | 2 | 0.084 | 2 |  |             |
| 48 | rs4645869  | FOS    | 14 | 75283172  | [T/C] | 0.051 | 1 | 0.019 | 1 |  | x           |
| 49 | rs2282695  | FOSB   | 19 | 45468703  | [G/C] | 0.420 | 2 | 0.317 | 1 |  |             |
| 50 | rs2276469  | FOSB   | 19 | 45471335  | [T/C] | 0.297 | 1 | 0.487 | 2 |  |             |
| 51 | rs1049739  | FOSB   | 19 | 45475117  | [T/C] | 0.326 | 1 | 0.394 | 2 |  |             |
| 52 | rs7256242  | FOSB   | 19 | 45476177  | [T/C] | 0.263 | 1 | 0.489 | 1 |  |             |
| 53 | rs1151520  | FOSL1  | 11 | 65892342  | [T/C] | 0.227 | 2 | 0.002 | 2 |  | x           |
| 54 | rs1151523  | FOSL1  | 11 | 65897729  | [T/C] | 0.259 | 1 | 0.446 | 2 |  |             |
| 55 | rs7940700  | FOSL1  | 11 | 65903526  | [A/G] | 0.350 | 1 | 0.022 | 1 |  | x           |
| 56 | rs1039823  | FOSL2  | 2  | 28400292  | [T/C] | 0.321 | 2 | 0.429 | 1 |  |             |
| 57 | rs6547851  | FOSL2  | 2  | 28406500  | [C/G] | 0.370 | 2 | 0.388 | 1 |  |             |
| 58 | rs931949   | FOSL2  | 2  | 28409324  | [A/G] | 0.029 | 1 | 0.239 | 1 |  | x           |
| 59 | rs2037547  | GSK3B  | 3  | 119825768 | [A/G] | 0.338 | 1 | 0.203 | 1 |  |             |
| 60 | rs2873950  | GSK3B  | 3  | 119828215 | [T/G] | 0.296 | 2 | 0.203 | 2 |  |             |
| 61 | rs4688043  | GSK3B  | 3  | 119872401 | [A/T] | 0.205 | 2 | 0.099 | 2 |  |             |
| 62 | rs7624540  | GSK3B  | 3  | 119890100 | [T/G] | 0.328 | 1 | 0.207 | 1 |  |             |
| 63 | rs13319151 | GSK3B  | 3  | 119897891 | [T/C] | 0.075 | 1 | 0.000 | 1 |  | x           |
| 64 | rs6438552  | GSK3B  | 3  | 119912967 | [A/G] | 0.128 | 1 | 0.418 | 2 |  |             |
| 65 | rs4072520  | GSK3B  | 3  | 119916546 | [T/G] | 0.446 | 2 | 0.213 | 1 |  |             |
| 66 | rs4491944  | GSK3B  | 3  | 119937224 | [A/C] | 0.097 | 1 | 0.002 | 1 |  | x           |
| 67 | rs6772172  | GSK3B  | 3  | 119969833 | [T/C] | 0.075 | 2 | 0.000 | 2 |  | x           |
| 68 | rs11919783 | GSK3B  | 3  | 120027786 | [A/G] | 0.058 | 1 | 0.100 | 1 |  |             |
| 69 | rs11923196 | GSK3B  | 3  | 120048209 | [T/A] | 0.060 | 1 | 0.000 | 1 |  | x           |
| 70 | rs9846422  | GSK3B  | 3  | 120094865 | [G/C] | 0.094 | 2 | 0.000 | 2 |  | x           |
| 71 | rs3755557  | GSK3B  | 3  | 120096110 | [T/A] | 0.092 | 2 | 0.166 | 2 |  |             |
| 72 | rs997768   | JUN    | 1  | 58779247  | [A/G] | 0.270 | 1 | 0.359 | 1 |  | 0.0001 (AA) |
| 73 | rs11688    | JUN    | 1  | 58782321  | [T/C] | 0.198 | 1 | 0.034 | 1 |  | x           |
| 74 | rs2984915  | JUN    | 1  | 58788023  | [A/G] | 0.362 | 2 | 0.086 | 1 |  |             |
| 75 | rs1063311  | MAPK1  | 22 | 21762178  | [A/G] | 0.295 | 1 | 0.440 | 1 |  |             |
| 76 | rs2266966  | MAPK1  | 22 | 21767265  | [T/C] | 0.314 | 2 | 0.440 | 2 |  |             |
| 77 | rs2006893  | MAPK1  | 22 | 21774389  | [T/C] | 0.314 | 1 | 0.463 | 2 |  |             |
| 78 | rs9607272  | MAPK1  | 22 | 21782109  | [A/C] | 0.101 | 2 | 0.244 | 2 |  |             |
| 79 | rs5999515  | MAPK1  | 22 | 21790812  | [T/C] | 0.338 | 1 | 0.459 | 1 |  |             |
| 80 | rs8136902  | MAPK1  | 22 | 21811268  | [A/G] | 0.242 | 1 | 0.002 | 1 |  | x           |
| 81 | rs7286558  | MAPK1  | 22 | 21825894  | [A/G] | 0.036 | 1 | 0.082 | 1 |  | x           |
| 82 | rs2283793  | MAPK1  | 22 | 21827189  | [A/G] | 0.263 | 2 | 0.440 | 2 |  |             |
| 83 | rs5999752  | MAPK1  | 22 | 21833894  | [T/C] | 0.220 | 1 | 0.440 | 1 |  |             |
| 84 | rs17759796 | MAPK1  | 22 | 21835874  | [T/G] | 0.046 | 1 | 0.142 | 1 |  | x           |
| 85 | rs12172554 | MAPK1  | 22 | 21840786  | [T/C] | 0.065 | 1 | 0.039 | 1 |  | x           |
| 86 | rs2283794  | MAPK1  | 22 | 21858180  | [A/G] | 0.377 | 1 | 0.461 | 1 |  |             |
| 87 | rs4821401  | MAPK1  | 22 | 21860283  | [A/G] | 0.022 | 2 | 0.015 | 2 |  | x           |
| 88 | rs4821402  | MAPK1  | 22 | 21860457  | [T/C] | 0.254 | 2 | 0.453 | 2 |  |             |
| 89 | rs5750113  | MAPK1  | 22 | 21865784  | [T/C] | 0.379 | 2 | 0.461 | 2 |  |             |
| 90 | rs851027   | MAPK14 | 6  | 36023098  | [T/C] | 0.263 | 1 | 0.278 | 1 |  |             |
| 91 | rs7770710  | MAPK14 | 6  | 36054980  | [T/C] | 0.181 | 1 | 0.028 | 1 |  | x           |
| 92 | rs3730327  | MAPK14 | 6  | 36059365  | [T/C] | 0.331 | 2 | 0.108 | 2 |  |             |
| 93 | rs6908372  | MAPK14 | 6  | 36062471  | [A/T] | 0.145 | 1 | 0.026 | 1 |  | x           |
| 94 | rs851011   | MAPK14 | 6  | 36070206  | [A/G] | 0.073 | 2 | 0.129 | 2 |  |             |
| 95 | rs851006   | MAPK14 | 6  | 36097408  | [T/C] | 0.217 | 1 | 0.272 | 1 |  |             |

|     |            |        |    |           |       |       |   |       |   |   |             |
|-----|------------|--------|----|-----------|-------|-------|---|-------|---|---|-------------|
| 96  | rs7761118  | MAPK14 | 6  | 36100526  | [T/C] | 0.268 | 1 | 0.108 | 1 |   |             |
| 97  | rs7698     | MAPK3  | 16 | 30114479  | [T/C] | 0.155 | 1 | 0.121 | 1 |   |             |
| 98  | rs12922100 | MAPK3  | 16 | 30118615  | [A/G] | 0.010 | 1 | 0.037 | 1 | x | x           |
| 99  | rs470797   | MBP    | 18 | 76990028  | [A/G] | 0.146 | 1 | 0.157 | 1 |   | 0.0003 (AA) |
| 100 | rs12458282 | MBP    | 18 | 77061897  | [T/C] | 0.135 | 2 | 0.315 | 2 |   |             |
| 101 | rs10733253 | MPDZ   | 9  | 13105639  | [T/C] | 0.333 | 1 | 0.047 | 1 |   |             |
| 102 | rs722651   | MPDZ   | 9  | 13106336  | [A/G] | 0.370 | 1 | 0.384 | 1 |   |             |
| 103 | rs3264     | MPDZ   | 9  | 13106599  | [A/G] | 0.309 | 2 | 0.343 | 2 |   |             |
| 104 | rs3765550  | MPDZ   | 9  | 13108795  | [A/G] | 0.169 | 2 | 0.476 | 2 |   |             |
| 105 | rs2274647  | MPDZ   | 9  | 13115423  | [A/C] | 0.355 | 2 | 0.297 | 2 |   |             |
| 106 | rs1929541  | MPDZ   | 9  | 13153275  | [A/G] | 0.338 | 1 | 0.300 | 2 |   |             |
| 107 | rs1999393  | MPDZ   | 9  | 13171438  | [T/C] | 0.493 | 1 | 0.264 | 2 |   |             |
| 108 | rs3780577  | MPDZ   | 9  | 13211405  | [G/C] | 0.399 | 2 | 0.292 | 1 |   |             |
| 109 | rs1999395  | MPDZ   | 9  | 13211722  | [C/G] | 0.394 | 2 | 0.295 | 1 |   |             |
| 110 | rs1389752  | MPDZ   | 9  | 13235288  | [T/A] | 0.244 | 2 | 0.112 | 2 |   |             |
| 111 | rs7041374  | MPDZ   | 9  | 13253914  | [C/G] | 0.483 | 2 | 0.332 | 1 |   |             |
| 112 | rs2074678  | NCDN   | 1  | 35562934  | [A/C] | 0.425 | 1 | 0.045 | 2 |   | x           |
| 113 | rs12094935 | NCDN   | 1  | 35563742  | [A/G] | 0.304 | 1 | 0.019 | 1 |   | x           |
| 114 | rs1413368  | NEGR1  | 1  | 71592869  | [A/G] | 0.355 | 2 | 0.006 | 2 |   | x           |
| 115 | rs3101336  | NEGR1  | 1  | 72285502  | [A/G] | 0.454 | 1 | 0.341 | 1 |   |             |
| 116 | rs980455   | NFKB1  | 4  | 102497800 | [T/C] | 0.457 | 2 | 0.310 | 2 |   |             |
| 117 | rs230530   | NFKB1  | 4  | 102532823 | [T/C] | 0.225 | 2 | 0.470 | 2 |   |             |
| 118 | rs230529   | NFKB1  | 4  | 102536261 | [A/G] | 0.394 | 1 | 0.302 | 1 |   |             |
| 119 | rs1801     | NFKB1  | 4  | 102579897 | [C/G] | 0.278 | 2 | 0.274 | 2 |   |             |
| 120 | rs3817685  | NFKB1  | 4  | 102613403 | [G/C] | 0.232 | 1 | 0.246 | 1 |   |             |
| 121 | rs1609798  | NFKB1  | 4  | 102616285 | [A/G] | 0.106 | 1 | 0.230 | 1 |   |             |
| 122 | rs6330     | NGFB   | 1  | 115286692 | [T/C] | 0.176 | 1 | 0.422 | 1 |   |             |
| 123 | rs6328     | NGFB   | 1  | 115287322 | [T/G] | 0.290 | 1 | 0.356 | 1 |   |             |
| 124 | rs2268793  | NGFB   | 1  | 115289162 | [A/G] | 0.039 | 1 | 0.082 | 1 | x |             |
| 125 | rs910330   | NGFB   | 1  | 115292879 | [A/C] | 0.292 | 1 | 0.306 | 1 |   |             |
| 126 | rs2856813  | NGFB   | 1  | 115295298 | [T/C] | 0.169 | 1 | 0.470 | 2 |   |             |
| 127 | rs4529705  | NGFB   | 1  | 115308870 | [T/C] | 0.384 | 2 | 0.315 | 1 |   |             |
| 128 | rs6537860  | NGFB   | 1  | 115313723 | [A/G] | 0.382 | 2 | 0.313 | 1 |   |             |
| 129 | rs4332358  | NGFB   | 1  | 115333024 | [T/C] | 0.362 | 2 | 0.333 | 1 |   |             |
| 130 | rs3811014  | NGFB   | 1  | 115339882 | [T/C] | 0.471 | 1 | 0.209 | 2 |   |             |
| 131 | rs7113041  | NRGN   | 11 | 124742695 | [C/G] | 0.353 | 2 | 0.261 | 1 |   |             |
| 132 | rs1045881  | NRXN1  | 2  | 49921834  | [T/C] | 0.167 | 1 | 0.198 | 1 |   |             |
| 133 | rs2193225  | NRXN1  | 2  | 50852344  | [A/G] | 0.215 | 2 | 0.468 | 1 |   |             |
| 134 | rs10490162 | NRXN1  | 2  | 51020519  | [A/G] | 0.085 | 2 | 0.114 | 2 |   |             |
| 135 | rs1995584  | NRXN1  | 2  | 51036011  | [A/G] | 0.290 | 1 | 0.468 | 1 |   |             |
| 136 | rs10146997 | NRXN3  | 14 | 79478819  | [T/C] | 0.374 | 2 | 0.157 | 2 |   |             |
| 137 | rs6334     | NTRK1  | 1  | 156876441 | [A/G] | 0.140 | 1 | 0.226 | 1 |   |             |
| 138 | rs6337     | NTRK1  | 1  | 156879203 | [T/C] | 0.205 | 1 | 0.295 | 2 |   |             |
| 139 | rs1187321  | NTRK2  | 9  | 84668116  | [T/A] | 0.495 | 1 | 0.164 | 2 |   |             |
| 140 | rs893584   | NTRK2  | 9  | 84676077  | [T/C] | 0.437 | 1 | 0.366 | 1 |   |             |
| 141 | rs1659409  | NTRK2  | 9  | 84703372  | [T/C] | 0.405 | 2 | 0.431 | 1 |   |             |
| 142 | rs1627784  | NTRK2  | 9  | 84813951  | [T/C] | 0.437 | 2 | 0.341 | 2 |   |             |
| 143 | rs2120266  | NTRK2  | 9  | 84841436  | [T/C] | 0.353 | 1 | 0.155 | 1 |   | 0.003 (AA)  |
| 144 | rs11140784 | NTRK2  | 9  | 84844508  | [T/C] | 0.007 | 2 | 0.037 | 2 | x | x           |

|     |            |              |    |          |       |       |   |       |   |            |
|-----|------------|--------------|----|----------|-------|-------|---|-------|---|------------|
| 145 | rs2165892  | <i>NTRK2</i> | 9  | 84944792 | [A/G] | 0.309 | 1 | 0.349 | 2 |            |
| 146 | rs2289658  | <i>NTRK2</i> | 9  | 84948455 | [A/G] | 0.063 | 2 | 0.039 | 2 | x          |
| 147 | rs2586566  | <i>NTRK2</i> | 9  | 84955997 | [A/G] | 0.447 | 1 | 0.188 | 2 |            |
| 148 | rs2277193  | <i>NTRK2</i> | 9  | 84959094 | [A/G] | 0.483 | 1 | 0.295 | 2 |            |
| 149 | rs4358872  | <i>NTRK2</i> | 9  | 84986054 | [A/C] | 0.401 | 2 | 0.418 | 1 |            |
| 150 | rs11795386 | <i>NTRK2</i> | 9  | 84987983 | [A/G] | 0.367 | 1 | 0.173 | 1 |            |
| 151 | rs1948308  | <i>NTRK2</i> | 9  | 85001342 | [T/C] | 0.389 | 1 | 0.425 | 2 |            |
| 152 | rs2378676  | <i>NTRK2</i> | 9  | 85004508 | [T/G] | 0.346 | 2 | 0.425 | 1 |            |
| 153 | rs4877900  | <i>NTRK2</i> | 9  | 85017403 | [A/G] | 0.483 | 2 | 0.410 | 2 |            |
| 154 | rs2427400  | <i>NTSR1</i> | 20 | 62704323 | [T/G] | 0.152 | 1 | 0.144 | 1 |            |
| 155 | rs3746780  | <i>NTSR1</i> | 20 | 62709934 | [T/C] | 0.488 | 1 | 0.216 | 2 |            |
| 156 | rs946478   | <i>NTSR1</i> | 20 | 62715640 | [C/G] | 0.319 | 1 | 0.248 | 2 |            |
| 157 | rs3787535  | <i>NTSR1</i> | 20 | 62722169 | [T/C] | 0.140 | 1 | 0.319 | 1 |            |
| 158 | rs6090453  | <i>NTSR1</i> | 20 | 62724010 | [G/C] | 0.169 | 1 | 0.453 | 1 |            |
| 159 | rs6089930  | <i>NTSR1</i> | 20 | 62727649 | [T/C] | 0.143 | 1 | 0.478 | 1 |            |
| 160 | rs3915568  | <i>NTSR1</i> | 20 | 62738120 | [A/G] | 0.041 | 2 | 0.267 | 2 | x          |
| 161 | rs856934   | <i>NTSR1</i> | 20 | 62752691 | [T/C] | 0.459 | 2 | 0.123 | 2 |            |
| 162 | rs2249938  | <i>NTSR1</i> | 20 | 62756052 | [A/G] | 0.469 | 2 | 0.119 | 2 |            |
| 163 | rs2427440  | <i>NTSR1</i> | 20 | 62759078 | [C/G] | 0.493 | 2 | 0.119 | 2 |            |
| 164 | rs12612207 | <i>NTSR2</i> | 2  | 11667090 | [T/C] | 0.216 | 1 | 0.498 | 2 | 0.008 (AA) |
| 165 | rs4669765  | <i>NTSR2</i> | 2  | 11668528 | [A/C] | 0.420 | 1 | 0.362 | 2 |            |
| 166 | rs7567183  | <i>NTSR2</i> | 2  | 11671160 | [A/G] | 0.370 | 2 | 0.362 | 2 |            |
| 167 | rs534288   | <i>PRKCE</i> | 2  | 45658870 | [T/G] | 0.362 | 2 | 0.315 | 2 |            |
| 168 | rs582384   | <i>PRKCE</i> | 2  | 45669298 | [T/G] | 0.167 | 1 | 0.457 | 2 |            |
| 169 | rs585156   | <i>PRKCE</i> | 2  | 45674616 | [T/C] | 0.416 | 2 | 0.315 | 2 |            |
| 170 | rs4446102  | <i>PRKCE</i> | 2  | 45770728 | [A/G] | 0.142 | 2 | 0.291 | 2 |            |
| 171 | rs4953262  | <i>PRKCE</i> | 2  | 45813654 | [T/C] | 0.454 | 2 | 0.489 | 1 |            |
| 172 | rs4953268  | <i>PRKCE</i> | 2  | 45842155 | [T/C] | 0.215 | 2 | 0.237 | 2 |            |
| 173 | rs1868389  | <i>PRKCE</i> | 2  | 45910730 | [A/G] | 0.456 | 1 | 0.474 | 1 |            |
| 174 | rs12466402 | <i>PRKCE</i> | 2  | 45946898 | [A/C] | 0.418 | 2 | 0.453 | 2 |            |
| 175 | rs12471357 | <i>PRKCE</i> | 2  | 45952523 | [T/C] | 0.416 | 1 | 0.435 | 1 |            |
| 176 | rs753572   | <i>PRKCE</i> | 2  | 45975199 | [T/C] | 0.481 | 1 | 0.315 | 1 |            |
| 177 | rs1987070  | <i>PRKCE</i> | 2  | 46010307 | [T/G] | 0.168 | 1 | 0.278 | 1 |            |
| 178 | rs3820733  | <i>PRKCE</i> | 2  | 46015835 | [T/C] | 0.029 | 1 | 0.127 | 1 | x          |
| 179 | rs6743504  | <i>PRKCE</i> | 2  | 46021613 | [A/G] | 0.413 | 2 | 0.413 | 2 |            |
| 180 | rs1009399  | <i>PRKCE</i> | 2  | 46040131 | [A/G] | 0.208 | 1 | 0.491 | 2 |            |
| 181 | rs921183   | <i>PRKCE</i> | 2  | 46063277 | [T/G] | 0.420 | 2 | 0.152 | 2 |            |
| 182 | rs10495930 | <i>PRKCE</i> | 2  | 46145536 | [A/G] | 0.237 | 2 | 0.168 | 2 |            |
| 183 | rs1020445  | <i>PRKCE</i> | 2  | 46146136 | [A/G] | 0.278 | 2 | 0.384 | 2 |            |
| 184 | rs4953321  | <i>PRKCE</i> | 2  | 46156260 | [T/G] | 0.406 | 1 | 0.390 | 2 |            |
| 185 | rs11125055 | <i>PRKCE</i> | 2  | 46166676 | [A/C] | 0.300 | 1 | 0.164 | 1 |            |

A1 indicates the minor allele

highlighted A1 indicates that A1 in AA is the opposite of A1 in EA

*P* values for HWE are for deviation from HWE in the control sample. Only *P* < 0.01 are shown.

#### SNPs excluded from the modified array due to failure or low frequency

|   | SNP       | Gene         |
|---|-----------|--------------|
| 1 | rs3760014 | <i>ADCY7</i> |
| 2 | rs4785402 | <i>ADCY7</i> |

3 rs7191958 *ADCY7*  
4 rs9926131 *ADCY7*  
5 rs1048220 *BDNF*  
6 rs2059336 *CREB1*  
7 rs10185283 *CREB1*  
8 rs10142078 *FOS*  
9 rs1892901 *FOSL1*  
10 rs925255 *FOSL2*  
11 rs12473028 *FOSL2*  
12 rs10495765 *FOSL2*  
13 rs7606480 *FOSL2*  
14 rs12624279 *FOSL2*  
15 rs2279990 *FOSL2*  
16 rs9878473 *GSK3B*  
17 rs3748814 *JUN*  
18 rs3810608 *MAPK1*  
19 rs12159146 *MAPK1*  
20 rs3788332 *MAPK1*  
21 rs3761980 *MAPK14*  
22 rs7752369 *MAPK14*  
23 rs13190744 *MAPK14*  
24 rs12918285 *MAPK3*  
25 rs9921806 *MAPK3*  
26 rs16930134 *MPDZ*  
27 rs10809907 *MPDZ*  
28 rs1556422 *MPDZ*  
29 rs7037618 *MPDZ*  
30 rs4740548 *MPDZ*  
31 rs17273542 *MPDZ*  
32 rs7863888 *MPDZ*  
33 rs11466112 *NGFB*  
34 rs11466110 *NGFB*  
35 rs6326 *NGFB*  
36 rs10776799 *NGFB*  
37 rs11698783 *NTSR1*  
38 rs2427430 *NTSR1*  
39 rs6432224 *NTSR2*

---

---

**notes**

---

new

new  
new

new

new

new  
new  
was AIMS  
new  
new

new

new  
new  
new  
new

new  
new

new

new  
new  
new  
new  
new  
new  
new

new  
new  
new  
new  
new  
new  
new  
new





Supplement Table 2. Association results ( $P < 0.05$ )

| Gene          | SNP        | Chr. | position  | Alleles<br>[1/2] | Location              | MAF<br>EA    | A1<br>EA | MAF<br>AA | A1<br>AA | $P$                |              |                      |                                      | M<br>o<br>d<br>e<br>l | OR <sup>1</sup> | L95  | U95  |
|---------------|------------|------|-----------|------------------|-----------------------|--------------|----------|-----------|----------|--------------------|--------------|----------------------|--------------------------------------|-----------------------|-----------------|------|------|
|               |            |      |           |                  |                       |              |          |           |          | EA                 |              | AA                   |                                      |                       |                 |      |      |
|               |            |      |           |                  |                       |              |          |           |          | OD<br>±CD          | OD<br>±CD    | CD<br>witho<br>ut OD | OD<br>±CD<br>and CD<br>without<br>OD |                       |                 |      |      |
| <i>ADCY7</i>  | rs729229   | 16   | 50299466  | [A/C]            | Intron                | 0.23         | 1        | 0.39      | 1        |                    | <b>0.047</b> |                      |                                      | R                     | 0.60            | 0.36 | 0.99 |
| <i>BDNF</i>   | rs7940188  | 11   | 27672192  | [G/C]            | Intron                | <b>0.004</b> | 2        | 0.35      | 2        |                    |              | 0.035                | D                                    | 0.67                  | 0.47            | 0.95 |      |
| <i>BDNF</i>   | rs11030121 | 11   | 27714660  | [A/G]            | Intron                | 0.24         | 1        | 0.44      | 1        |                    | <b>0.035</b> |                      | R                                    | 1.60                  | 1.03            | 2.47 |      |
| <i>CDK5R1</i> | rs4523973  | 17   | 32482437  | [A/G]            | upstream              | 0.37         | 2        | 0.26      | 2        | <b>0.006</b>       |              |                      | D                                    | 1.53                  | 1.13            | 2.06 |      |
| <i>CDK5R1</i> | rs756785   | 17   | 32485827  | [A/G]            | upstream              | 0.37         | 1        | 0.30      | 1        | <b>0.006</b>       |              |                      | D                                    | 1.53                  | 1.13            | 2.06 |      |
| <i>CREB1</i>  | rs2551919  | 2    | 207565659 | [T/C]            | Intron                | 0.22         | 1        | 0.12      | 1        |                    | 0.018        | 0.044                | D                                    | 1.63                  | 1.09            | 2.46 |      |
| <i>EFNA1</i>  | rs4745     | 1    | 155133751 | [T/A]            | Asp159Val             | 0.46         | 2        | 0.16      | 1        | 0.045              |              |                      | D                                    | 0.72                  | 0.52            | 0.99 |      |
| <i>EPHA4</i>  | rs3770208  | 2    | 221419926 | [A/G]            | 3' UTR                | 0.43         | 1        | 0.34      | 2        |                    | 0.022        | 0.044                | D                                    | 1.49                  | 1.08            | 2.05 |      |
| <i>EPHA4</i>  | rs2288629  | 2    | 221442590 | [A/C]            | Intron                | 0.24         | 2        | 0.22      | 2        | 0.039 <sup>2</sup> |              |                      | D                                    | 0.73                  | 0.54            | 0.98 |      |
| <i>EPHA6</i>  | rs6790692  | 3    | 97494371  | [T/A]            | Intron                | 0.19         | 2        | 0.17      | 1        |                    |              | <b>0.006</b>         | D                                    | 0.56                  | 0.37            | 0.85 |      |
| <i>EPHB1</i>  | rs36110    | 3    | 134981345 | [A/G]            | Intron                | 0.42         | 2        | 0.16      | 2        | 0.039              |              |                      | R                                    | 0.66                  | 0.45            | 0.98 |      |
| <i>FOSL2</i>  | rs1039823  | 2    | 28400292  | [T/C]            | Intron                | 0.43         | 1        | 0.32      | 2        |                    | <b>0.007</b> | 0.021                | D                                    | 0.63                  | 0.46            | 0.87 |      |
| <i>FOSL2</i>  | rs6547851  | 2    | 28406500  | [C/G]            | Intron                | 0.39         | 1        | 0.37      | 2        |                    | 0.023        | 0.011                | D                                    | 0.64                  | 0.46            | 0.89 |      |
| <i>GSK3B</i>  | rs4688043  | 3    | 119872401 | [A/T]            | Intron                | 0.10         | 2        | 0.21      | 2        |                    | 0.037        | 0.025                | D                                    | 0.68                  | 0.49            | 0.95 |      |
| <i>GSK3B</i>  | rs4072520  | 3    | 119916546 | [T/G]            | Intron                | 0.21         | 1        | 0.45      | 2        |                    | 0.017        | 0.030                | D                                    | 1.61                  | 1.09            | 2.38 |      |
| <i>MAPK1</i>  | rs2006893  | 22   | 21774389  | [T/C]            | Intron                | 0.46         | 2        | 0.31      | 1        |                    |              | 0.011                | D                                    | 0.62                  | 0.43            | 0.90 |      |
| <i>MAPK1</i>  | rs8136902  | 22   | 21811268  | [A/G]            | Intron                | <b>0.002</b> | 1        | 0.24      | 1        |                    |              | 0.036                | D                                    | 1.48                  | 1.03            | 2.12 |      |
| <i>MAPK1</i>  | rs7286558  | 22   | 21825894  | [A/G]            | Intron                | 0.08         | 1        | 0.04      | 1        | 0.040              |              |                      | R                                    | 0.21                  | 0.05            | 0.93 |      |
| <i>MAPK14</i> | rs851027   | 6    | 36023098  | [T/C]            | Upstream <sup>3</sup> | 0.28         | 1        | 0.26      | 1        |                    |              | 0.021                | D                                    | 1.53                  | 1.07            | 2.20 |      |
| <i>MAPK14</i> | rs851011   | 6    | 36070206  | [A/G]            | Intron                | 0.13         | 2        | 0.07      | 2        |                    | 0.042        |                      | D                                    | 0.55                  | 0.31            | 0.98 |      |
| <i>MBP</i>    | rs470797   | 18   | 76990028  | [A/G]            | Tyr203Ter             | 0.16         | 1        | 0.15      | 1        | 0.036 <sup>2</sup> |              |                      | R                                    | 0.40                  | 0.17            | 0.94 |      |
| <i>MPDZ</i>   | rs3264     | 9    | 13106599  | [A/G]            | 3' UTR                | 0.34         | 2        | 0.31      | 2        | 0.015              |              | <b>0.007</b>         | R                                    | 2.30                  | 1.26            | 4.19 |      |
| <i>MPDZ</i>   | rs1999395  | 9    | 13211722  | [C/G]            | Intron                | 0.30         | 1        | 0.39      | 2        |                    |              | 0.033                | D                                    | 0.67                  | 0.46            | 0.97 |      |
| <i>MPDZ</i>   | rs1389752  | 9    | 13235288  | [T/A]            | Intron                | 0.11         | 2        | 0.24      | 2        | 0.030              |              |                      | D                                    | 1.47                  | 1.04            | 2.09 |      |
| <i>NFKB1</i>  | rs230530   | 4    | 102532823 | [T/C]            | Intron                | 0.47         | 1        | 0.23      | 2        | <b>0.005</b>       | 0.037        | <b>0.007</b>         | R                                    | 0.37                  | 0.19            | 0.73 |      |
| <i>NFKB1</i>  | rs1801     | 4    | 102579897 | [C/G]            | Intron                | 0.27         | 2        | 0.28      | 2        | 0.028              |              |                      | D                                    | 1.39                  | 1.04            | 1.86 |      |
| <i>NFKB1</i>  | rs3817685  | 4    | 102613403 | [G/C]            | Intron                | 0.25         | 1        | 0.23      | 1        | 0.017              |              |                      | D                                    | 1.43                  | 1.07            | 1.92 |      |
| <i>NFKB1</i>  | rs1609798  | 4    | 102616285 | [A/G]            | Intron                | 0.23         | 1        | 0.11      | 1        | <b>0.002</b>       |              |                      | D                                    | 1.60                  | 1.19            | 2.15 |      |
| <i>NGFB</i>   | rs2856813  | 1    | 115295298 | [T/C]            | Intron                | 0.47         | 2        | 0.17      | 1        |                    |              | 0.020                | D                                    | 1.57                  | 1.07            | 2.28 |      |

|              |            |    |           |       |          |      |   |      |   |                    |       |              |       |   |      |      |      |
|--------------|------------|----|-----------|-------|----------|------|---|------|---|--------------------|-------|--------------|-------|---|------|------|------|
| <i>NGFB</i>  | rs4529705  | 1  | 115308870 | [T/C] | Intron   | 0.32 | 1 | 0.38 | 2 |                    |       |              | 0.048 | D | 1.39 | 1.00 | 1.93 |
| <i>NGFB</i>  | rs3811014  | 1  | 115339882 | [T/C] | upstream | 0.21 | 2 | 0.47 | 1 | 0.026              |       |              |       | D | 0.71 | 0.53 | 0.96 |
| <i>NRXN1</i> | rs1045881  | 2  | 49921834  | [T/C] | 3' UTR   | 0.20 | 1 | 0.17 | 1 |                    | 0.018 | 0.034        | 0.010 | D | 0.63 | 0.45 | 0.90 |
| <i>NTRK1</i> | rs6337     | 1  | 156879203 | [T/C] | Ala623=  | 0.30 | 2 | 0.21 | 1 |                    |       | 0.049        |       | R | 0.43 | 0.18 | 1.00 |
| <i>NTRK2</i> | rs1187321  | 9  | 84668116  | [T/A] | upstream | 0.16 | 2 | 0.50 | 1 | 0.020 <sup>2</sup> |       |              |       | D | 1.45 | 1.06 | 1.98 |
| <i>NTRK2</i> | rs893584   | 9  | 84676077  | [T/C] | Intron   | 0.37 | 1 | 0.44 | 1 | <b>0.008</b>       |       |              |       | R | 1.81 | 1.17 | 2.80 |
| <i>NTRK2</i> | rs1659409  | 9  | 84703372  | [T/C] | Intron   | 0.43 | 1 | 0.41 | 2 | <b>0.002</b>       |       |              |       | R | 1.82 | 1.24 | 2.66 |
| <i>NTRK2</i> | rs2165892  | 9  | 84944792  | [A/G] | Intron   | 0.35 | 2 | 0.31 | 1 |                    | 0.016 |              |       | D | 1.55 | 1.09 | 2.21 |
| <i>NTRK2</i> | rs2586566  | 9  | 84955997  | [A/G] | Intron   | 0.19 | 2 | 0.45 | 1 | <b>0.008</b>       |       |              |       | D | 1.51 | 1.11 | 2.04 |
| <i>NTRK2</i> | rs1948308  | 9  | 85001342  | [T/C] | Intron   | 0.43 | 2 | 0.39 | 1 |                    |       | 0.013        | 0.022 | R | 1.83 | 1.14 | 2.94 |
| <i>NTRK2</i> | rs2378676  | 9  | 85004508  | [T/G] | Intron   | 0.43 | 1 | 0.35 | 2 |                    |       | 0.012        | 0.025 | R | 1.96 | 1.16 | 3.31 |
| <i>NTSR1</i> | rs3915568  | 20 | 62738120  | [A/G] | Intron   | 0.27 | 2 | 0.04 | 2 | <b>0.001</b>       |       |              |       | D | 0.60 | 0.45 | 0.80 |
| <i>PRKCE</i> | rs534288   | 2  | 45658870  | [T/G] | Intron   | 0.32 | 2 | 0.36 | 2 | 0.035              |       |              |       | R | 0.61 | 0.38 | 0.96 |
| <i>PRKCE</i> | rs582384   | 2  | 45669298  | [T/G] | Intron   | 0.46 | 2 | 0.17 | 1 |                    |       | <b>0.008</b> |       | D | 0.57 | 0.38 | 0.87 |
| <i>PRKCE</i> | rs10495930 | 2  | 46145536  | [A/G] | Intron   | 0.17 | 2 | 0.24 | 2 | 0.018 <sup>2</sup> |       |              |       | R | 0.41 | 0.19 | 0.86 |
| <i>PRKCE</i> | rs1020445  | 2  | 46146136  | [A/G] | Intron   | 0.38 | 2 | 0.28 | 2 | <b>0.002</b>       |       |              |       | R | 0.52 | 0.34 | 0.78 |

The table include the results presented in Table 3 of the manuscript ( $P < 0.01$ , in bold)

<sup>1</sup>OR is listed for the lowest  $P$  values.

<sup>2</sup>These SNPs showed lower  $P$  values when analyzed in the more homogenous EA sample

<sup>3</sup>This SNP is located in an intron of *SLC26A8*

OR > 1 represents risk effect of the minor allele, OR < 1 represents protective effect of the minor allele

Solid box indicates SNP in strong LD in EA ( $r^2 > 0.7$ )

Dashed box indicates SNPs in modest LD in EA and AA ( $D' > 0.94$ ,  $r^2 < 0.7$ )

Double box indicates SNPs in strong LD in EA and AA ( $D' > 0.96$ ,  $r^2 > 0.7$ )

Highlighted A1 value represent a case were the minor allele in EA is the major allele in AA and vice versa

Abbreviations: A1, minor allele; OR, Odds ratio; L95, 95% confidence interval lower value; U95, 95% confidence interval upper value; D, dominant; R, recessive
